# Supplementary material for: Pragmatic Adaptive Trial for Respiratory Infection in Children (PATRIC) Clinical Registry protocol
Source: PubMed Central journal article supplement — BMJ Open. 2024 Jan 25;14(1):e074308. doi: 10.1136/bmjopen-2023-074308 (PMC10824052; doi:10.1136/bmjopen-2023-074308), 2024-01-25
Supplement: bmjopen-2023-074308.draft_revisions.pdf [file bmjopen-2023-074308.draft_revisions.pdf]

# BMJ Open

BMJ Open is committed to open peer review. As part of this commitment we make the peer review history of every article we publish publicly available.

When an article is published we post the peer reviewers' comments and the authors' responses online. We also post the versions of the paper that were used during peer review. These are the versions that the peer review comments apply to.

The versions of the paper that follow are the versions that were submitted during the peer review process. They are not the versions of record or the final published versions. They should not be cited or distributed as the published version of this manuscript.

BMJ Open is an open access journal and the full, final, typeset and author-corrected version of record of the manuscript is available on our site with no access controls, subscription charges or pay-per-view fees (<http://bmjopen.bmj.com>).

If you have any questions on BMJ Open's open peer review process please email [info.bmjopen@bmj.com](mailto:info.bmjopen@bmj.com)

# BMJ Open

## The Pragmatic Adaptive Trial for Respiratory Infection in Children (PATRIC) Clinical Registry Protocol

|                               |                                                                                                                                                                                                                                                                                                                                                                                                                                                                                                                                                                                                                                                                                                                                                                                                                                                                                                                                                                                                                                                                                                                                                                                                                                                                                                     |
|-------------------------------|-----------------------------------------------------------------------------------------------------------------------------------------------------------------------------------------------------------------------------------------------------------------------------------------------------------------------------------------------------------------------------------------------------------------------------------------------------------------------------------------------------------------------------------------------------------------------------------------------------------------------------------------------------------------------------------------------------------------------------------------------------------------------------------------------------------------------------------------------------------------------------------------------------------------------------------------------------------------------------------------------------------------------------------------------------------------------------------------------------------------------------------------------------------------------------------------------------------------------------------------------------------------------------------------------------|
| Journal:                      | <i>BMJ Open</i>                                                                                                                                                                                                                                                                                                                                                                                                                                                                                                                                                                                                                                                                                                                                                                                                                                                                                                                                                                                                                                                                                                                                                                                                                                                                                     |
| Manuscript ID                 | bmjopen-2023-074308                                                                                                                                                                                                                                                                                                                                                                                                                                                                                                                                                                                                                                                                                                                                                                                                                                                                                                                                                                                                                                                                                                                                                                                                                                                                                 |
| Article Type:                 | Protocol                                                                                                                                                                                                                                                                                                                                                                                                                                                                                                                                                                                                                                                                                                                                                                                                                                                                                                                                                                                                                                                                                                                                                                                                                                                                                            |
| Date Submitted by the Author: | 04-Apr-2023                                                                                                                                                                                                                                                                                                                                                                                                                                                                                                                                                                                                                                                                                                                                                                                                                                                                                                                                                                                                                                                                                                                                                                                                                                                                                         |
| Complete List of Authors:     | <p>Pavlos, Rebecca; Telethon Kids Institute, Wesfarmers Centre of Vaccines and Infectious Diseases</p> <p>Bhuiyan, Mejbah; Telethon Kids Institute, Wesfarmers Centre of Vaccines and Infectious Diseases</p> <p>Jones, Mark; The University of Sydney, School of Public Health</p> <p>Oakes, Daniel; Telethon Kids Institute, Wesfarmers Centre of Vaccines and Infectious Diseases</p> <p>O'Brien, Sharon; Perth Children's Hospital, Emergency Department</p> <p>Borland, Meredith; Perth Children's Hospital, Emergency Department; The University of Western Australia, School of Medicine, Faculty of Health and Medical Sciences</p> <p>Doyle, Sarah; What the Doctor Said</p> <p>Richmond, Peter; The University of Western Australia, School of Medicine, Faculty of Health and Medical Sciences; Perth Children's Hospital, Department of General Paediatrics</p> <p>Martin, Andrew C.; Perth Children's Hospital, Department of General Paediatrics</p> <p>Snelling, Thomas; Telethon Kids Institute, Wesfarmers Centre of Vaccines and Infectious Diseases; Sydney Children's Hospitals Network Randwick</p> <p>Blyth, Christopher C.; Telethon Kids Institute, Wesfarmers Centre of Vaccines and Infectious Diseases; Perth Children's Hospital, Department of Infectious Diseases</p> |
| Keywords:                     | Respiratory infections < THORACIC MEDICINE, REGISTRIES, PAEDIATRICS, Clinical trials < THERAPEUTICS                                                                                                                                                                                                                                                                                                                                                                                                                                                                                                                                                                                                                                                                                                                                                                                                                                                                                                                                                                                                                                                                                                                                                                                                 |
|                               |                                                                                                                                                                                                                                                                                                                                                                                                                                                                                                                                                                                                                                                                                                                                                                                                                                                                                                                                                                                                                                                                                                                                                                                                                                                                                                     |

SCHOLARONE™  
Manuscripts

## The Pragmatic Adaptive Trial for Respiratory Infection in Children (PATRIC) Clinical Registry Protocol

Rebecca Pavlos<sup>1</sup>, PhD, Mejbah U Bhuiyan<sup>1</sup>, PhD, Mark A Jones<sup>2</sup> MBIostat, Daniel B Oakes<sup>1</sup> MPH, Sharon O'Brien<sup>3</sup> PhD, Meredith L Borland<sup>3,4</sup> MBBS, Sarah Doyle<sup>5</sup> MBBS, Peter C Richmond<sup>1,4,6</sup>, FRACP, Andrew Martin<sup>6</sup> MD, Thomas L Snelling<sup>1,2,7,8</sup>, PhD, Christopher C Blyth<sup>1,4,9,10</sup>, PhD.

<sup>1</sup>*Wesfarmers Centre of Vaccines and Infectious Diseases, Telethon Kids Institute, Nedlands, Australia*

<sup>2</sup>*School of Public Health, University of Sydney, Camperdown, Australia*

<sup>3</sup>*Emergency Department, Perth Children's Hospital, Nedlands, Australia*

<sup>4</sup>*School of Medicine, Faculty of Health and Medical Sciences, The University of Western Australia, Crawley, Australia*

<sup>5</sup>*What the Doctor Said, North Perth, Australia*

<sup>6</sup>*Department of General Paediatrics, Perth Children's Hospital, Nedlands, Australia*

<sup>7</sup>*Sydney Children's Hospital Network, Sydney, Australia*

<sup>8</sup>*Menzies School of Health Research, Charles Darwin University, Darwin, Australia*

<sup>9</sup>*Department of Microbiology, PathWest Laboratory Medicine, QEII Medical Centre, Nedlands, Australia*

<sup>10</sup>*Department of Infectious Diseases, Perth Children's Hospital, Nedlands, Australia*

### Abstract

### Introduction

Acute Respiratory Infections (ARI) are the most common cause of paediatric hospitalisation. There is an urgent need to address ongoing critical knowledge gaps in ARI management. The Pragmatic Adaptive Trial for Respiratory Infections in Children (PATRIC) Clinical Registry will evaluate current treatments and outcomes for ARI in a variety of paediatric patient groups. The registry will provide a platform and data to inform a number of PATRIC clinical trials, testing various interventions in ARI treatment and management to optimise paediatric ARI care.

### Methods and analysis

1  
2  
3 The PATRIC Clinical Registry is a single centre, prospective observational registry recruiting from  
4 a tertiary paediatric Emergency Department in Western Australia. Through characterising  
5 demographic, clinical, treatment and outcome data, the PATRIC Clinical Registry will improve  
6 our understanding of antibiotic utilisation and ARI outcomes in children.  
7  
8  
9

### 10 **Ethics and dissemination**

11  
12  
13 The PATRIC Clinical Registry is conducted in accordance with the Declaration of Helsinki, and  
14 the International Council for Harmonisation (ICH) Guidelines for Good Clinical Practice  
15 (CPMP/ICH/13595) July 1996. Approval is provided by the Child and Adolescent Health Service  
16 (CAHS) Human Research Ethics Committee (HREC). Study results will be communicated by  
17 presentation and publication (HREC: RGS0000003078.)  
18  
19  
20  
21

22 **Trial registration number:** Australian New Zealand Clinical Trials Registry (ANZCTR):  
23 ACTRN12619000903189. UTN: U1111-1231-3365.  
24  
25

26 **Keywords:** Respiratory Tract Infections, Registries, Pediatrics, Pragmatic Clinical Trials  
27  
28

29 **Word count:** 2465  
30

### 31 **Corresponding author:**

32 Professor Christopher C. Blyth MBBS(Hons), DCH, FRACP, FRCPA, PhD  
33  
34

35 Affiliations: <sup>1</sup>Wesfarmers Centre of Vaccines and Infectious Diseases, Telethon Kids Institute,  
36 Nedlands, Australia; <sup>4</sup>School of Medicine, Faculty of Health and Medical Sciences, The  
37 University of Western Australia, Crawley, Australia; <sup>9</sup>Department of Microbiology, PathWest  
38 Laboratory Medicine, QEII Medical Centre, Nedlands, Australia; <sup>10</sup>Department of Infectious  
39 Diseases, Perth Children's Hospital, Nedlands, Australia.  
40  
41

42 Postal address: GPO Box D184, Perth, Western Australia 6840  
43

44 Telephone: (+61) 8 6456 5614  
45

46 Email: christopher.blyth@uwa.edu.au  
47  
48  
49

### 50 **Strengths and limitations of this study:**

- 51  
52  
53  
54  
55  
56  
57  
58  
59  
60
- This clinical registry promotes acute respiratory infections (ARI) care optimisation and provides a platform for future ARI intervention trials.

- Patient-reported outcomes and use of parent's hand-held devices enables a more flexible approach to registry data collection.
- Emergency department recruitment may result in the enrolment of children with more severe ARI
- Follow-up is dependent on parental recall and timely data entry by parents
- Current study materials may not be culturally appropriate for all patient groups (i.e., Aboriginal and Torres Strait Islander populations, who experience an increased burden of ARI)

## Introduction

Acute respiratory infections (ARI), inclusive of both upper and lower respiratory tract infections (URTI, LRTI), are common in children. While URTI is mostly mild and self-limiting, LRTIs including pneumonia and bronchiolitis are frequent causes of paediatric hospital admissions. Outside the neonatal period, ARI remains the leading cause of childhood mortality (1) with global data (2019) estimating that LRTI resulted in 671,927 deaths, and 59.2 million disability-adjusted life years for children under 5 years (2). In Australia, ARI-associated mortality is rare, but the morbidity and economic burden of paediatric ARI remains substantial. It is estimated that, on average, Australian children experience thirteen ARI episodes in their first two years of life (3). In Western Australia (WA), ARI is the most common reason for childhood presentation to an emergency department and hospitalisation (4), with at least one in four Aboriginal children and one in fifteen non-Aboriginal children in WA hospitalised for a chest infection before their fifth birthday (5).

Most ARI episodes are secondary to respiratory viruses (6, 7). A recent case-control study investigating the viral and bacterial burden of pneumonia in WA children found that one or more respiratory virus was identified in 56% of cases versus 29% of controls (6). The population-attributable fraction for pneumonia by Respiratory Syncytial Virus (RSV), Human metapneumovirus (HMPV), influenza, and adenovirus was estimated to 20%, 10%, 6% and 4% respectively. This is compared with the most frequently detected bacterial species, *Mycoplasma*

1  
2  
3 *pneumoniae* (attributable fraction; 7%). *Streptococcus pneumoniae*, *Haemophilus influenzae* and  
4 *Streptococcus pyogenes* are important bacterial causes of ARI.  
5  
6  
7

8 Many of the current treatment recommendations for paediatric ARI have not been tested through  
9 clinical trials. Antibiotics are frequently prescribed for management of childhood pneumonia and  
10 many other ARIs (6, 8). However, given the substantial contribution of respiratory viruses to  
11 paediatric ARI, antibiotics may have little or no benefit in most ARI cases. Antimicrobial  
12 resistance (AMR) has been identified by the World Health Organization as a serious global threat.  
13 Injudicious use of antibiotics for ARI care contributes to the global concern of AMR (9). Well-  
14 designed antimicrobial trials for ARI management, conducted in the era of conjugate  
15 pneumococcal and HiB vaccination are few in number (10) and supportive care trials have been  
16 infrequently performed (11).  
17  
18  
19  
20  
21  
22  
23  
24

25 More than a decade ago, the Infectious Disease Society of America (IDSA) recommended robust  
26 time-to-event analyses in ARI trial design (12). However, despite numerous professional societies  
27 noting the limited trial data (10, 13), there has been slow progress towards evidence-based  
28 antimicrobial use in ARI management. Traditional randomised controlled trials have inherent  
29 design limitations, including increased expense, reduced generalisability, and delays in research  
30 translation. Provided the ongoing uncertainty about optimal ARI management strategies, the  
31 increasing threat of AMR and new therapeutic options expected; barriers to conducting clinical  
32 trials for ARI in paediatric populations must be overcome.  
33  
34  
35  
36  
37  
38  
39  
40

41 To drive and inform evidence-based ARI care, we have established a prospective clinical registry  
42 recruiting children with ARI presenting for urgent care at the emergency department (ED). This  
43 has been developed to document risk factors, symptoms, severity and duration of illness,  
44 microbiology (when obtained), treatment adherence and disease outcomes and to explore factors  
45 associated with rapid symptom resolution. The Pragmatic Adaptive Trial for Respiratory Infection  
46 in Children (PATRIC) Clinical Registry serves as a research platform, generating critical baseline  
47 data for future clinical trials in ARI, focusing on time-to-event endpoints. Commencing in a single  
48 centre, the registry has been designed to expand into a multicentre registry and adaptive clinical  
49 trial platform.  
50  
51  
52  
53  
54  
55  
56  
57  
58  
59  
60

## Primary objective

The PATRIC Clinical Registry aims to: (i) accurately and efficiently characterise demographic, clinical, treatment, and outcome data from eligible participants in order to optimise the care of children with ARI and, (ii) provide the underlying preliminary evidence and platform for a pragmatic adaptive clinical trial on childhood ARI, a critical step towards evidence-based ARI care.

## Secondary objectives

Secondary objectives are to: (i) demonstrate the willingness of parents and/or guardians (hereafter referred to as parents) to enrol their children in an electronic prospective ARI registry; (ii) estimate the distribution of treatment response under alternative management options within different ARI patient subgroups; (iii) optimise parent-reported outcomes and refine patient-reported outcome measures for ARI treatment and (iv) provide surveillance data to characterise seasonal trends in ARI and real-time data for ARI epidemics as they arise.

## Methods and analysis

### Study design

The PATRIC Clinical Registry is an observational, prospective cohort of patients who present to an emergency department with an ARI. Information including demographic, symptoms, vaccination history, medical history, treatment, and follow-up responses are collected.

The PATRIC Clinical Registry provides the foundation for the PATRIC platform, collecting baseline data and enabling future trials evaluating ARI interventions to be nested within the platform. While this manuscript describes the methodology for the PATRIC Clinical Registry, each individual trial to be conducted within the PATRIC platform will have an independent protocol, with unique objectives and outcomes. Each PATRIC trial will also have individual ethics

1  
2  
3 and regulatory approvals as required. It is proposed that trials may involve antimicrobial,  
4 immunomodulatory, and supportive care interventions.  
5  
6  
7  
8  
9

### 10 **Patient and community involvement**

11  
12 The objectives of the PATRIC Clinical Registry have been discussed with, and supported by, the  
13 *Wesfarmers Centre of Vaccines and Infectious Diseases (WCVID) Consumer Reference Group* to  
14 ensure the study objectives and procedures are relevant and acceptable for the ARI patient  
15 community. An information video, participant information sheet, e-consent forms, e-survey, and  
16 supportive information sheets were co-designed with input from consumers and tested for usability  
17 and acceptance with a pilot group of parents of young children (14). Intervention in the future  
18 PATRIC trials will also be guided by discussions and the priorities of the WCVID consumer  
19 reference group as well as other consumer groups.  
20  
21  
22  
23  
24  
25  
26  
27  
28

### 29 **Study setting**

30  
31 Participants are enrolled from children presenting with physician-diagnosed ARI to the emergency  
32 department. At time of writing, recruitment is underway at Perth Children's Hospital (PCH),  
33 Western Australia (WA). The PCH is the only tertiary paediatric hospital for the state of WA  
34 (population: 2.6 million (15)). It is intended that the PATRIC Clinical Registry will be  
35 implemented across multiple sites in Australia, initially focusing on paediatric emergency  
36 departments. Recruitment started in February 2020 and is ongoing. The PATRIC Clinical Registry  
37 is designed to prospectively collect data on eligible participants.  
38  
39  
40  
41  
42  
43  
44  
45  
46

### 47 **Eligibility criteria, sample size and recruitment procedures**

#### 48 ***Inclusion Criteria***

49  
50  
51 Children and adolescents who meet the following criteria are eligible for registry enrolment:  
52

- 53 (i) aged  $\geq 1$  months and  $<18$  years AND  
54  
55  
56  
57  
58  
59  
60



- (ii) symptoms and signs of ARI: a documented fever  $\geq 37.5^{\circ}\text{C}$  or history of fever in the past 96 hours AND cough, and/or shortness of breath and/or influenza-like symptoms such as sore throat or fatigue AND
- (iii) total duration of symptoms  $< 21$  days at time of enrolment.

### ***Exclusion criteria***

A potentially eligible child who meets any of the following criteria will be excluded from participation:

- (i) children  $< 1$  months old or 18 years and older OR
- (ii) previous participation in PATRIC within the last 3 months OR
- (iii) parents whose English is insufficient to understand study materials, OR
- (iv) parents do not complete the baseline survey, OR
- (v) parents not willing or able to provide consent.

### ***Patient recruitment and consent***

The registry does not have a fixed sample size. ED research nurses will identify and approach parents whose children meet the eligibility criteria. Parents are then presented a departmental electronic tablet to view the 3min participant information video, information form and electronic consent form. They are also able to access these materials on their own hand-held device using a QR code. Upon completion of the electronic consent a copy of the participant information sheet, and signed electronic consent is sent to the parents' email address. As shown in Figure 1, The Day 0 baseline survey is then sent immediately to the parent/carers mobile phone following completion of the e-consent form. The Research Electronic Data Capture application (REDCap; Vanderbilt University, Nashville, TN, US), application is used for e-consent, follow-up surveys, and the case report form.

### **Data collection procedures**

#### ***Day 0 survey***

1  
2  
3 Parent-reported surveys sent on day 0 collect information on demographics, relevant comorbidities  
4 (e.g., immunodeficiency, chronic heart, and lung disease), history of any previous hospitalisation  
5 with severe respiratory infections, household structure (number of children and adults), attendance  
6 at out-of-home care/education (playgroup/mothers' group, day-care, kindergarten, preschool or  
7 school), symptoms and behaviours observed in the preceding 24 hours (using the Canadian Acute  
8 Respiratory Illness and Flu Scale, CARIFS (16)), additional symptoms to better capture lower  
9 respiratory involvement (wheezing and difficulty breathing), and antibiotics or antivirals received  
10 prior to the ED visit.  
11  
12  
13  
14  
15  
16  
17

### 18 ***Case Report Form (CRF), immunisation data, and biological samples***

19 In additional to parent-completed Day 0 baseline survey, information on a patient electronic CRF  
20 is entered by a research nurse, and includes information on demographics (age, sex, postcode, and  
21 ethnicity), presentation and ED management (health assessments, support required, investigations  
22 required and results, discharge diagnosis, and medications provided). Immunisations registered  
23 with the Australian Immunisation Registry are collected independently and linked to the  
24 participant using 3 identifiers (name, DOB, Medicare number). The e-consent form also provides  
25 the option to consent to the salvage of biological specimens collected during routine care for the  
26 ARI episode.  
27  
28  
29  
30  
31  
32  
33  
34  
35  
36

### 37 ***Follow-up***

38 Patient-reported outcome and patient-reported outcome measures are recommended as a way of  
39 capturing the true impact of disease on children and families over time. Parents receive weekly  
40 follow up surveys every 7 days from day 7 until symptom recovery, or day 28 (whichever occurs  
41 earlier), sent to parents' smart phones via automated messaging. Parents are also asked to report  
42 on the presence and severity of several respiratory, behavioural, and activity-based outcomes  
43 (using CARIFS) and additional symptoms (wheezing and difficulty breathing) to capture lower  
44 respiratory involvement. Additional outcomes, developed in collaboration with consumers, are  
45 requested at each time point. These include parents answering "yes" or "no" to the question: "Is  
46 your child still sick?". In addition, two summary questions are asked: a) "Has your child returned  
47 to playgroup/mothers' group, day-care, kindergarten, preschool or school in last 7 days?", if yes,  
48  
49  
50  
51  
52  
53  
54  
55  
56  
57  
58  
59  
60

1  
2  
3 “when”); and b) “Is your child as active as usual today?”, if yes, “When did your child return to  
4 their usual level of activity?” Parents are also asked if their child has received additional medical  
5 care or prescription medication.  
6  
7

8  
9  
10 If the parent completing a follow-up survey on Day 7, 14, 21 or 28 reports that their child is “still  
11 sick”, they will be provided with the option to access a link to downloadable supportive  
12 information sheet “*Respiratory Tract Infection – General Home Care Advice*”. This resource has  
13 been developed in consultation with clinicians and parent groups. The instructions are written at  
14 a level of readability appropriate for the general population with accompanying pictograms.  
15 Emphasis has also been placed on making the information accessible for all parents including those  
16 with low health literacy. The information sheet outlines how to provide supportive care for a child  
17 with an ARI, provides links to further resources as well as contact phone numbers for further health  
18 advice.  
19  
20  
21  
22  
23  
24  
25  
26  
27  
28

## 29 **Outcome measures**

### 30 ***Primary Outcome***

31  
32 The primary endpoint for the registry will be the return to pre-morbid health state, as assessed by  
33 parents, by day 7. This will be determined by the parental survey response on day 7.  
34  
35  
36  
37  
38  
39

### 40 ***Secondary Outcomes***

41  
42 The secondary endpoints for the registry are: (i) time to full recovery of ARI symptoms (in days,  
43 (ii) time to return to normal childhood activities (in days; defined as: sufficient improvement to  
44 return to day-care; school; playgroups or other social outings), (iii) proportion of children who  
45 have returned to their pre-morbid health state by day 7, 14, 21 and 28, (iv) proportion of children  
46 who are free from cough by day 7, 14, 21 and 28, (v) proportion of children who are free from  
47 fever by day 7, 14, 21 and 28, (vi) proportion of children with clinical failure (defined as: repeat  
48 emergency presentation or hospitalisation; general practice re-presentation; modification or  
49 unplanned prolongation of antibiotic therapy) by day 7, 14, 21, 28, (vii) proportion of children  
50  
51  
52  
53  
54  
55  
56  
57  
58  
59  
60

1  
2  
3 intolerant to therapy. These endpoints will be assessed using data from the parental surveys and/or  
4 any post enrolment return presentation to the ED.  
5  
6  
7  
8  
9

## 10 **Data management**

11  
12 Registry data derived from parental surveys, parental instruction sheet information, case report  
13 forms, laboratory and pharmacy records, and imaging results will be directly entered into a web-  
14 based database (REDCap). To ensure all data is stored safely in confidential conditions, each  
15 participant record will be referred to by a unique study-specific identifier and accessible only by  
16 study personnel. Paper materials linking the participant to medical data or any other database  
17 material will be maintained on site in a secure location.  
18  
19  
20  
21  
22  
23  
24

## 25 **Data analysis plan**

26  
27  
28 Proportion reaching the primary outcome and the median time to reach secondary outcomes, as  
29 determined by parental surveys, will be assessed in the PATRIC Clinical Registry. Subgroup  
30 analysis, by age group, risk factors and treatments prescribed will be performed. Severe outcomes,  
31 including hospital representation, will be cross-checked against the medical record. The proportion  
32 lost to follow up prior to return to their premorbid state will also be reported.  
33  
34  
35  
36

37 Summarised descriptive statistics for individual demographics, risk factors, concurrent  
38 medications, allergies, immunisation status, ARI diagnosis and clinical markers of severity  
39 (temperature, respiratory rate, oxygen saturations on air) will be reported for all enrolled  
40 participants. Subgroup analysis will be stratified by age groups (infants: <12 months; young  
41 children: 13-59 months; older children:  $\geq 60$  months), antibiotic exposure (before presentation to  
42 hospital, prescribed during their hospital stay or by other healthcare provider during follow-up  
43 period), laboratory-confirmed viral and bacterial ARI and risk factors (e.g., immunocompromising  
44 conditions).  
45  
46  
47  
48  
49  
50

51 Proportions for categorical variables will be summarised as frequency and percent proportion, with  
52 95% confidence intervals. Frequencies below five will be reported as “<5” to ensure  
53 confidentiality. Summaries of continuous variables will be reported as mean and standard  
54  
55  
56  
57  
58  
59  
60

1  
2  
3 deviation for symmetric distributions and median and interquartile range for asymmetric  
4 distributions.  
5  
6  
7  
8  
9

### 10 **Use of the platform for nested clinical trials**

11  
12 The PATRIC Clinical Registry provides a framework for intervention studies, randomising  
13 participants to specific diagnostic approaches and treatments. PATRIC trials share similar data and  
14 use the same clinical outcomes. Data from the registry will continue to inform trial simulations  
15 and provided baselines for standard of care. A pilot clinical trial, assessing the optimal duration of  
16 amoxicillin duration in physician-diagnosed community-acquired pneumonia is underway  
17 (ACTRN12621000967886).  
18  
19  
20  
21  
22  
23  
24

### 25 **Ethics and dissemination**

26  
27  
28 The PATRIC platform and embedded registry is conducted in accordance with the principles of  
29 the Declaration of Helsinki, the International Council for Harmonisation (ICH) Guidelines for  
30 Good Clinical Practice (CPMP/ICH/13595). Platform materials, including protocols and  
31 amendments are submitted to an appropriate human research ethics committee (HREC), and host  
32 institution for written approval as required. Written consent is obtained from parents during  
33 recruitment. PATRIC staff ensure the participants' anonymity is maintained through de-  
34 identifying data and using a participant identifier for analysis. All data is collected, stored, and  
35 removed in compliance with data protection laws. Study results will be communicated by  
36 presentation and journal publication.  
37  
38  
39  
40  
41  
42  
43  
44  
45

### 46 **Acknowledgements**

47  
48  
49 Authors wish to thank consumers Catherine Hughes and Alanna Garner Bell who provided  
50 feedback on the protocol and study materials, and ED research nursing staff (Annika  
51 Featherstone, Catherine Power, Dana Aindow, Dayna Luscombe, Katy Whitten, Lisa Properjohn,  
52 Melanie Dowd, Melissa O'Brien Smith, and Patricia Clifford) who have assisted with  
53 recruitment. The authors wish to thank all families who have participated to date.  
54  
55  
56  
57  
58  
59  
60

### Authors contributions

RP, MUB, MLB, TLS and CCB designed the registry and trial platform. Expert advice was provided by AM and PCR. RP and CCB wrote the protocol, sought ethics approval and funding. MUB developed the database and MAJ assisted with statistical advice and simulations for nested clinical trials. RP, SD, MLB and CCB designed electronic consent and registry materials. RP and DO led the writing of this manuscript. All authors have read and approved the final version of this manuscript.

### Funding statement

At initiation, the trial had funding from Telethon Kids Institute, The Ramaciotti Foundation and University of Western Australia. Further grant applications have been submitted. TLS is supported by a MRFF Investigator Award (MRF1195153). CCB is supported by a NHMRC Investigator Award (GNT1173163).

### Competing interest's statement

The authors have no competing interests to disclose.

*Figure 1: Flowchart of PATRIC registry design surveys, and the case report form*

### References:

1. GBD 2019 Diseases and Injuries Collaborators. Global burden of 369 diseases and injuries in 204 countries and territories, 1990-2019: a systematic analysis for the Global Burden of Disease Study 2019. *Lancet*. 2020;396(10258):1204-22.
2. Paulson KR, Kamath AM, Alam T, Bienhoff K, Abady GG, Abbas J, et al. Global, regional, and national progress towards Sustainable Development Goal 3.2 for neonatal and child health: all-cause and cause-specific mortality findings from the Global Burden of Disease Study 2019. *The Lancet*. 2021;398(10303):870-905.
3. Sarna M, Ware RS, Sloots TP, Nissen MD, Grimwood K, Lambert SB. The burden of community-managed acute respiratory infections in the first 2-years of life. *Pediatr Pulmonol*. 2016;51(12):1336-46.
4. Barnes R, Blyth CC, de Klerk N, Lee WH, Borland ML, Richmond P, et al. Geographical disparities in emergency department presentations for acute respiratory infections and risk factors

1  
2  
3 for presenting: a population-based cohort study of Western Australian children. *BMJ Open*.  
4 2019;9(2):e025360.

5 5. Moore HC, de Klerk N, Richmond P, Lehmann D. A retrospective population-based cohort  
6 study identifying target areas for prevention of acute lower respiratory infections in children. *BMC*  
7 *Public Health*. 2010;10:757.

8 6. Bhuiyan MU, Snelling TL, West R, Lang J, Rahman T, Granl, et al. The contribution of  
9 viruses and bacteria to community-acquired pneumonia in vaccinated children: A case-control  
10 study. *Thorax*. 2019;74(3):261-9.

11 7. Jain S, Williams DJ, Arnold SR, Ampofo K, Bramley AM, Reed C, et al. Community-  
12 Acquired Pneumonia Requiring Hospitalization among U.S. Children. *New England Journal of*  
13 *Medicine*. 2015;372(9):835-45.

14 8. Biezen R, Pollack AJ, Harrison C, Brijnath B, Grando D, Britt HC, et al. Respiratory tract  
15 infections among children younger than 5 years: current management in Australian general  
16 practice. *Med J Aust*. 2015;202(5):262-6.

17 9. World Health Organization (WHO). The evolving threat of antimicrobial resistance :  
18 options for action. Geneva: World Health Organization; 2012.

19 10. Bradley JS, Byington CL, Shah SS, Alverson B, Carter ER, Harrison C, et al. Executive  
20 summary: the management of community-acquired pneumonia in infants and children older than  
21 3 months of age: clinical practice guidelines by the Pediatric Infectious Diseases Society and the  
22 Infectious Diseases Society of America. *Clinical infectious diseases : an official publication of the*  
23 *Infectious Diseases Society of America*. 2011;53(7):617-30.

24 11. Oakley E, Babl FE, Acworth J, Borland M, Kreiser D, Neutze J, et al. A prospective  
25 randomised trial comparing nasogastric with intravenous hydration in children with bronchiolitis  
26 (protocol): the comparative rehydration in bronchiolitis study (CRIB). *BMC Pediatr*. 2010;10:37.

27 12. Spellberg B, Talbot GH, Brass EP, Bradley JS, Boucher HW, Gilbert DN, et al. Position  
28 paper: recommended design features of future clinical trials of antibacterial agents for community-  
29 acquired pneumonia. *Clinical infectious diseases : an official publication of the Infectious Diseases*  
30 *Society of America*. 2008;47 Suppl 3:S249-65.

31 13. Harris M, Clark J, Coote N, Fletcher P, Harnden A, McKean M, et al. British Thoracic  
32 Society guidelines for the management of community acquired pneumonia in children: update  
33 2011. *Thorax*. 2011;66 Suppl 2:ii1-23.

34 14. Doyle S, Pavlos R, Carlson SJ, Barton K, Bhuiyan M, Boeing B, et al. Efficacy of Digital  
35 Health Tools for a Pediatric Patient Registry: Semistructured Interviews and Interface Usability  
36 Testing With Parents and Clinicians. *JMIR Form Res*. 2022;6(1):e29889.

37 15. Australian Bureau of Statistics (ABS). Snapshot of Australia [Internet]. [cited 2022  
38 November 23] ed2021.

39 16. Jacobs B, Young NL, Dick PT, Ipp MM, Dutkowski R, Davies HD, et al. Canadian Acute  
40 Respiratory Illness and Flu Scale (CARIFS): Development of a valid measure for childhood  
41 respiratory infections. *Journal of clinical epidemiology*. 2000;53(8):793-9.

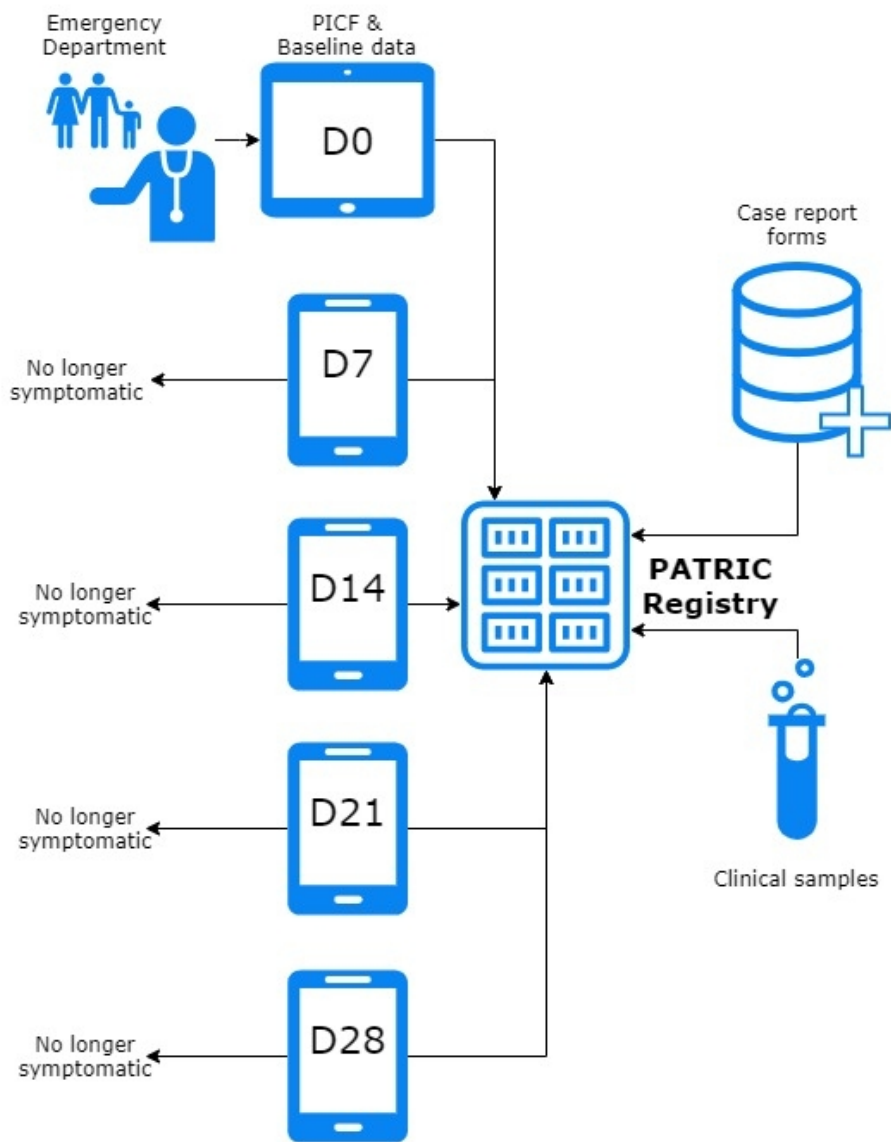

Figure 1: Flowchart of PATRIC registry design surveys, and the case report form

195x245mm (72 x 72 DPI)



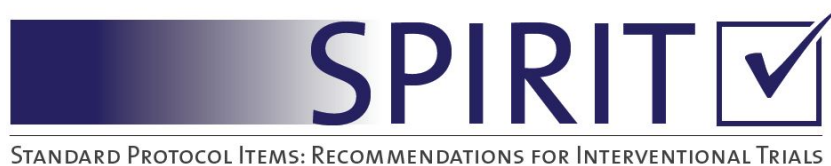

STANDARD PROTOCOL ITEMS: RECOMMENDATIONS FOR INTERVENTIONAL TRIALS

SPIRIT 2013 Checklist: Recommended items to address in a clinical trial protocol and related documents\*

| Section/item                      | Item No | Description                                                                                                                                                                                                                                                                              | Page number addressing item |
|-----------------------------------|---------|------------------------------------------------------------------------------------------------------------------------------------------------------------------------------------------------------------------------------------------------------------------------------------------|-----------------------------|
| <b>Administrative information</b> |         |                                                                                                                                                                                                                                                                                          |                             |
| Title                             | 1       | Descriptive title identifying the study design, population, interventions, and, if applicable, trial acronym                                                                                                                                                                             | Page 1                      |
| Trial registration                | 2a      | Trial identifier and registry name. If not yet registered, name of intended registry                                                                                                                                                                                                     | Page 1                      |
|                                   | 2b      | All items from the World Health Organization Trial Registration Data Set                                                                                                                                                                                                                 | Page 1                      |
| Protocol version                  | 3       | Date and version identifier                                                                                                                                                                                                                                                              | N/A                         |
| Funding                           | 4       | Sources and types of financial, material, and other support                                                                                                                                                                                                                              | Page 12                     |
| Roles and responsibilities        | 5a      | Names, affiliations, and roles of protocol contributors                                                                                                                                                                                                                                  | Page 1, 11                  |
|                                   | 5b      | Name and contact information for the trial sponsor                                                                                                                                                                                                                                       | Page 12                     |
|                                   | 5c      | Role of study sponsor and funders, if any, in study design; collection, management, analysis, and interpretation of data; writing of the report; and the decision to submit the report for publication, including whether they will have ultimate authority over any of these activities | Investigator led, Page 12.  |
|                                   | 5d      | Composition, roles, and responsibilities of the coordinating centre, steering committee, endpoint adjudication committee, data management team, and other individuals or groups overseeing the trial, if applicable (see Item 21a for data monitoring committee)                         | N/A                         |
| <b>Introductio</b>                |         |                                                                                                                                                                                                                                                                                          |                             |

|                                                           |     |                                                                                                                                                                                                           |          |
|-----------------------------------------------------------|-----|-----------------------------------------------------------------------------------------------------------------------------------------------------------------------------------------------------------|----------|
| <b>n</b>                                                  |     |                                                                                                                                                                                                           |          |
| Background and rationale                                  | 6a  | Description of research question and justification for undertaking the trial, including summary of relevant studies (published and unpublished) examining benefits and harms for each intervention        | Page 3-4 |
|                                                           | 6b  | Explanation for choice of comparators                                                                                                                                                                     | N/A      |
| Objectives                                                | 7   | Specific objectives or hypotheses                                                                                                                                                                         | Page 4-5 |
| Trial design                                              | 8   | Description of trial design including type of trial (eg, parallel group, crossover, factorial, single group), allocation ratio, and framework (eg, superiority, equivalence, noninferiority, exploratory) | Page 5   |
| <b>Methods: Participants, interventions, and outcomes</b> |     |                                                                                                                                                                                                           |          |
| Study setting                                             | 9   | Description of study settings (eg, community clinic, academic hospital) and list of countries where data will be collected. Reference to where list of study sites can be obtained                        | Page 6   |
| Eligibility criteria                                      | 10  | Inclusion and exclusion criteria for participants. If applicable, eligibility criteria for study centres and individuals who will perform the interventions (eg, surgeons, psychotherapists)              | Page 6-7 |
| Interventions                                             | 11a | Interventions for each group with sufficient detail to allow replication, including how and when they will be administered                                                                                | N/A      |
|                                                           | 11b | Criteria for discontinuing or modifying allocated interventions for a given trial participant (eg, drug dose change in response to harms, participant request, or improving/worsening disease)            | N/A      |
|                                                           | 11c | Strategies to improve adherence to intervention protocols, and any procedures for monitoring adherence (eg, drug tablet return, laboratory tests)                                                         | N/A      |

|                                                                     |     |                                                                                                                                                                                                                                                                                                                                                                                |           |
|---------------------------------------------------------------------|-----|--------------------------------------------------------------------------------------------------------------------------------------------------------------------------------------------------------------------------------------------------------------------------------------------------------------------------------------------------------------------------------|-----------|
|                                                                     | 11d | Relevant concomitant care and interventions that are permitted or prohibited during the trial                                                                                                                                                                                                                                                                                  | N/A       |
| Outcomes                                                            | 12  | Primary, secondary, and other outcomes, including the specific measurement variable (eg, systolic blood pressure), analysis metric (eg, change from baseline, final value, time to event), method of aggregation (eg, median, proportion), and time point for each outcome. Explanation of the clinical relevance of chosen efficacy and harm outcomes is strongly recommended | Page 9-10 |
| Participant timeline                                                | 13  | Time schedule of enrolment, interventions (including any run-ins and washouts), assessments, and visits for participants. A schematic diagram is highly recommended (see Figure)                                                                                                                                                                                               | Page 7-9  |
| Sample size                                                         | 14  | Estimated number of participants needed to achieve study objectives and how it was determined, including clinical and statistical assumptions supporting any sample size calculations                                                                                                                                                                                          | N/A       |
| Recruitment                                                         | 15  | Strategies for achieving adequate participant enrolment to reach target sample size                                                                                                                                                                                                                                                                                            | Page 7    |
| <b>Methods: Assignment of interventions (for controlled trials)</b> |     |                                                                                                                                                                                                                                                                                                                                                                                |           |
| Allocation:                                                         |     |                                                                                                                                                                                                                                                                                                                                                                                |           |
| Sequence generation                                                 | 16a | Method of generating the allocation sequence (eg, computer-generated random numbers), and list of any factors for stratification. To reduce predictability of a random sequence, details of any planned restriction (eg, blocking) should be provided in a separate document that is unavailable to those who enrol participants or assign interventions                       | N/A       |

|                                                           |     |                                                                                                                                                                                                                                                                                                                                                                                                              |           |
|-----------------------------------------------------------|-----|--------------------------------------------------------------------------------------------------------------------------------------------------------------------------------------------------------------------------------------------------------------------------------------------------------------------------------------------------------------------------------------------------------------|-----------|
| Allocation concealment mechanism                          | 16b | Mechanism of implementing the allocation sequence (eg, central telephone; sequentially numbered, opaque, sealed envelopes), describing any steps to conceal the sequence until interventions are assigned                                                                                                                                                                                                    | N/A       |
| Implementation                                            | 16c | Who will generate the allocation sequence, who will enrol participants, and who will assign participants to interventions                                                                                                                                                                                                                                                                                    | N/A       |
| Blinding (masking)                                        | 17a | Who will be blinded after assignment to interventions (eg, trial participants, care providers, outcome assessors, data analysts), and how                                                                                                                                                                                                                                                                    | N/A       |
|                                                           | 17b | If blinded, circumstances under which unblinding is permissible, and procedure for revealing a participant's allocated intervention during the trial                                                                                                                                                                                                                                                         | N/A       |
| <b>Methods: Data collection, management, and analysis</b> |     |                                                                                                                                                                                                                                                                                                                                                                                                              |           |
| Data collection methods                                   | 18a | Plans for assessment and collection of outcome, baseline, and other trial data, including any related processes to promote data quality (eg, duplicate measurements, training of assessors) and a description of study instruments (eg, questionnaires, laboratory tests) along with their reliability and validity, if known. Reference to where data collection forms can be found, if not in the protocol | Page 7-9  |
|                                                           | 18b | Plans to promote participant retention and complete follow-up, including list of any outcome data to be collected for participants who discontinue or deviate from intervention protocols                                                                                                                                                                                                                    | Page 7-10 |
| Data management                                           | 19  | Plans for data entry, coding, security, and storage, including any related processes to promote data quality (eg, double                                                                                                                                                                                                                                                                                     | Page 9-10 |

|                            |     |                                                                                                                                                                                                                                                                                                                                       |         |
|----------------------------|-----|---------------------------------------------------------------------------------------------------------------------------------------------------------------------------------------------------------------------------------------------------------------------------------------------------------------------------------------|---------|
|                            |     | data entry; range checks for data values). Reference to where details of data management procedures can be found, if not in the protocol                                                                                                                                                                                              |         |
| Statistical methods        | 20a | Statistical methods for analysing primary and secondary outcomes. Reference to where other details of the statistical analysis plan can be found, if not in the protocol                                                                                                                                                              | Page 10 |
|                            | 20b | Methods for any additional analyses (eg, subgroup and adjusted analyses)                                                                                                                                                                                                                                                              | Page 10 |
|                            | 20c | Definition of analysis population relating to protocol non-adherence (eg, as randomised analysis), and any statistical methods to handle missing data (eg, multiple imputation)                                                                                                                                                       | Page 10 |
| <b>Methods: Monitoring</b> |     |                                                                                                                                                                                                                                                                                                                                       |         |
| Data monitoring            | 21a | Composition of data monitoring committee (DMC); summary of its role and reporting structure; statement of whether it is independent from the sponsor and competing interests; and reference to where further details about its charter can be found, if not in the protocol. Alternatively, an explanation of why a DMC is not needed | N/A     |
|                            | 21b | Description of any interim analyses and stopping guidelines, including who will have access to these interim results and make the final decision to terminate the trial                                                                                                                                                               | Page 10 |
| Harms                      | 22  | Plans for collecting, assessing, reporting, and managing solicited and spontaneously reported adverse events and other unintended effects of trial interventions or trial conduct                                                                                                                                                     | N/A     |
| Auditing                   | 23  | Frequency and procedures for auditing trial conduct, if any, and whether the process will be                                                                                                                                                                                                                                          | N/A     |

|                                 |     |                                                                                                                                                                                                                                  |         |
|---------------------------------|-----|----------------------------------------------------------------------------------------------------------------------------------------------------------------------------------------------------------------------------------|---------|
|                                 |     | independent from investigators and the sponsor                                                                                                                                                                                   |         |
| <b>Ethics and dissemination</b> |     |                                                                                                                                                                                                                                  |         |
| Research ethics approval        | 24  | Plans for seeking research ethics committee/institutional review board (REC/IRB) approval                                                                                                                                        | Page 11 |
| Protocol amendments             | 25  | Plans for communicating important protocol modifications (eg, changes to eligibility criteria, outcomes, analyses) to relevant parties (eg, investigators, REC/IRBs, trial participants, trial registries, journals, regulators) | Page 5  |
| Consent or assent               | 26a | Who will obtain informed consent or assent from potential trial participants or authorised surrogates, and how (see Item 32)                                                                                                     | Page 7  |
|                                 | 26b | Additional consent provisions for collection and use of participant data and biological specimens in ancillary studies, if applicable                                                                                            | Page 7  |
| Confidentiality                 | 27  | How personal information about potential and enrolled participants will be collected, shared, and maintained in order to protect confidentiality before, during, and after the trial                                             | Page 10 |
| Declaration of interests        | 28  | Financial and other competing interests for principal investigators for the overall trial and each study site                                                                                                                    | Page 12 |
| Access to data                  | 29  | Statement of who will have access to the final trial dataset, and disclosure of contractual agreements that limit such access for investigators                                                                                  | Page 10 |
| Ancillary and post-trial care   | 30  | Provisions, if any, for ancillary and post-trial care, and for compensation to those who suffer harm from trial participation                                                                                                    | N/A     |
| Dissemination policy            | 31a | Plans for investigators and sponsor to communicate trial results to participants, healthcare professionals, the public, and other relevant groups (eg, via                                                                       | Page 11 |

|                            |     |                                                                                                                                                                                                |     |
|----------------------------|-----|------------------------------------------------------------------------------------------------------------------------------------------------------------------------------------------------|-----|
|                            |     | publication, reporting in results databases, or other data sharing arrangements), including any publication restrictions                                                                       |     |
|                            | 31b | Authorship eligibility guidelines and any intended use of professional writers                                                                                                                 | N/A |
|                            | 31c | Plans, if any, for granting public access to the full protocol, participant-level dataset, and statistical code                                                                                | N/A |
| <b>Appendices</b>          |     |                                                                                                                                                                                                |     |
| Informed consent materials | 32  | Model consent form and other related documentation given to participants and authorised surrogates                                                                                             | N/A |
| Biological specimens       | 33  | Plans for collection, laboratory evaluation, and storage of biological specimens for genetic or molecular analysis in the current trial and for future use in ancillary studies, if applicable | N/A |

\*It is strongly recommended that this checklist be read in conjunction with the SPIRIT 2013 Explanation & Elaboration for important clarification on the items. Amendments to the protocol should be tracked and dated. The SPIRIT checklist is copyrighted by the SPIRIT Group under the Creative Commons "[Attribution-NonCommercial-NoDerivs 3.0 Unported](https://creativecommons.org/licenses/by-nc-nd/3.0/)" license.

# BMJ Open

## The Pragmatic Adaptive Trial for Respiratory Infection in Children (PATRIC) Clinical Registry Protocol

|                                 |                                                                                                                                                                                                                                                                                                                                                                                                                                                                                                                                                                                                                                                                                                                                                                                                                                                                                                                                                                                                                                                                                                                                                                                                                                                                                                                                                                 |
|---------------------------------|-----------------------------------------------------------------------------------------------------------------------------------------------------------------------------------------------------------------------------------------------------------------------------------------------------------------------------------------------------------------------------------------------------------------------------------------------------------------------------------------------------------------------------------------------------------------------------------------------------------------------------------------------------------------------------------------------------------------------------------------------------------------------------------------------------------------------------------------------------------------------------------------------------------------------------------------------------------------------------------------------------------------------------------------------------------------------------------------------------------------------------------------------------------------------------------------------------------------------------------------------------------------------------------------------------------------------------------------------------------------|
| Journal:                        | <i>BMJ Open</i>                                                                                                                                                                                                                                                                                                                                                                                                                                                                                                                                                                                                                                                                                                                                                                                                                                                                                                                                                                                                                                                                                                                                                                                                                                                                                                                                                 |
| Manuscript ID                   | bmjopen-2023-074308.R1                                                                                                                                                                                                                                                                                                                                                                                                                                                                                                                                                                                                                                                                                                                                                                                                                                                                                                                                                                                                                                                                                                                                                                                                                                                                                                                                          |
| Article Type:                   | Protocol                                                                                                                                                                                                                                                                                                                                                                                                                                                                                                                                                                                                                                                                                                                                                                                                                                                                                                                                                                                                                                                                                                                                                                                                                                                                                                                                                        |
| Date Submitted by the Author:   | 08-Dec-2023                                                                                                                                                                                                                                                                                                                                                                                                                                                                                                                                                                                                                                                                                                                                                                                                                                                                                                                                                                                                                                                                                                                                                                                                                                                                                                                                                     |
| Complete List of Authors:       | <p>Pavlos, Rebecca; Telethon Kids Institute, Wesfarmers Centre of Vaccines and Infectious Diseases<br/>         Bhuiyan, Mejbah; Telethon Kids Institute, Wesfarmers Centre of Vaccines and Infectious Diseases<br/>         Jones, Mark; The University of Sydney, School of Public Health<br/>         Oakes, Daniel; Telethon Kids Institute, Wesfarmers Centre of Vaccines and Infectious Diseases<br/>         O'Brien, Sharon; Perth Children's Hospital, Emergency Department<br/>         Borland, Meredith; Perth Children's Hospital, Emergency Department; The University of Western Australia, School of Medicine, Faculty of Health and Medical Sciences<br/>         Doyle, Sarah; What the Doctor Said<br/>         Richmond, Peter; The University of Western Australia, School of Medicine, Faculty of Health and Medical Sciences; Perth Children's Hospital, Department of General Paediatrics<br/>         Martin, Andrew C.; Perth Children's Hospital, Department of General Paediatrics<br/>         Snelling, Thomas; Telethon Kids Institute, Wesfarmers Centre of Vaccines and Infectious Diseases; Sydney Children's Hospitals Network Randwick<br/>         Blyth, Christopher C.; Telethon Kids Institute, Wesfarmers Centre of Vaccines and Infectious Diseases; Perth Children's Hospital, Department of Infectious Diseases</p> |
| <b>Primary Subject Heading</b>: | Paediatrics                                                                                                                                                                                                                                                                                                                                                                                                                                                                                                                                                                                                                                                                                                                                                                                                                                                                                                                                                                                                                                                                                                                                                                                                                                                                                                                                                     |
| Secondary Subject Heading:      | Respiratory medicine, Infectious diseases                                                                                                                                                                                                                                                                                                                                                                                                                                                                                                                                                                                                                                                                                                                                                                                                                                                                                                                                                                                                                                                                                                                                                                                                                                                                                                                       |
| Keywords:                       | Respiratory infections < THORACIC MEDICINE, REGISTRIES, PAEDIATRICS, Clinical trials < THERAPEUTICS                                                                                                                                                                                                                                                                                                                                                                                                                                                                                                                                                                                                                                                                                                                                                                                                                                                                                                                                                                                                                                                                                                                                                                                                                                                             |
|                                 |                                                                                                                                                                                                                                                                                                                                                                                                                                                                                                                                                                                                                                                                                                                                                                                                                                                                                                                                                                                                                                                                                                                                                                                                                                                                                                                                                                 |

SCHOLARONE™  
Manuscripts



1  
2  
3 **1 The Pragmatic Adaptive Trial for Respiratory Infection in Children (PATRIC) Clinical**  
4  
5 **2 Registry Protocol**  
6

7 3 Rebecca Pavlos<sup>1</sup>, PhD, Mejbah U Bhuiyan<sup>1</sup>, PhD, Mark A Jones<sup>2</sup> MBIostat, Daniel B Oakes<sup>1</sup>  
8 4 MPH, Sharon O'Brien<sup>3</sup> PhD, Meredith L Borland<sup>3,4</sup> MBBS, Sarah Doyle<sup>5</sup> MBBS, Peter C  
9 5 Richmond<sup>1,4,6</sup>, MBBS, Andrew Martin<sup>6</sup> MD, Thomas L Snelling<sup>1,2,7,8</sup>, PhD, Christopher C  
10 6 Blyth<sup>1,4,9,10</sup>, PhD.  
11  
12  
13

14  
15 7 *<sup>1</sup>Wesfarmers Centre of Vaccines and Infectious Diseases, Telethon Kids Institute, Nedlands,*  
16 8 *Australia*

17  
18 9 *<sup>2</sup>School of Public Health, University of Sydney, Camperdown, Australia*

19  
20 10 *<sup>3</sup>Emergency Department, Perth Children's Hospital, Nedlands, Australia*

21  
22 11 *<sup>4</sup>School of Medicine, Faculty of Health and Medical Sciences, The University of Western*  
23 12 *Australia, Crawley, Australia*

24  
25 13 *<sup>5</sup>What the Doctor Said, North Perth, Australia*

26  
27 14 *<sup>6</sup>Department of General Paediatrics, Perth Children's Hospital, Nedlands, Australia*

28  
29 15 *<sup>7</sup>Sydney Children's Hospital Network, Sydney, Australia*

30  
31 16 *<sup>8</sup>Menzies School of Health Research, Charles Darwin University, Darwin, Australia*

32  
33 17 *<sup>9</sup>Department of Microbiology, PathWest Laboratory Medicine, QEII Medical Centre, Nedlands,*  
34 18 *Australia*

35  
36 19 *<sup>10</sup>Department of Infectious Diseases, Perth Children's Hospital, Nedlands, Australia*  
37  
38  
39

40 **21 Corresponding author:**

41  
42 22 Professor Christopher C. Blyth MBBS(Hons), DCH, FRACP, FRCPA, PhD

43  
44 23 Affiliations: <sup>1</sup>Wesfarmers Centre of Vaccines and Infectious Diseases, Telethon Kids Institute,  
45 24 Nedlands, Australia; <sup>4</sup>School of Medicine, Faculty of Health and Medical Sciences, The  
46 25 University of Western Australia, Crawley, Australia; <sup>9</sup>Department of Microbiology, PathWest  
47 26 Laboratory Medicine, QEII Medical Centre, Nedlands, Australia; <sup>10</sup>Department of Infectious  
48 27 Diseases, Perth Children's Hospital, Nedlands, Australia.  
49  
50

51 28 Postal address: GPO Box D184, Perth, Western Australia 6840

52  
53 29 Telephone: (+61) 8 6456 5614

54  
55 30 Email: christopher.blyth@uwa.edu.au  
56  
57  
58  
59  
60

1

## 2 **Abstract**

### 3 **Introduction**

4 Acute Respiratory Infections (ARI) are the most common cause of paediatric hospitalisation. There  
5 is an urgent need to address ongoing critical knowledge gaps in ARI management. The Pragmatic  
6 Adaptive Trial for Respiratory Infections in Children (PATRIC) Clinical Registry will evaluate  
7 current treatments and outcomes for ARI in a variety of paediatric patient groups. The registry will  
8 provide a platform and data to inform a number of PATRIC clinical trials, testing various  
9 interventions in ARI treatment and management to optimise paediatric ARI care.

### 10 **Methods and analysis**

11 The PATRIC Clinical Registry is a single centre, prospective observational registry recruiting from  
12 a tertiary paediatric Emergency Department in Western Australia. Through characterising  
13 demographic, clinical, treatment and outcome data, the PATRIC Clinical Registry will improve  
14 our understanding of antibiotic utilisation and ARI outcomes in children.

### 15 **Ethics and dissemination**

16 The PATRIC Clinical Registry is conducted in accordance with the Declaration of Helsinki, and  
17 the International Council for Harmonisation (ICH) Guidelines for Good Clinical Practice  
18 (CPMP/ICH/13595) July 1996. Approval is provided by the Child and Adolescent Health Service  
19 (CAHS) Human Research Ethics Committee (HREC). Study results will be communicated by  
20 presentation and publication (HREC: RGS0000003078.)

21 **Trial registration number:** Australian New Zealand Clinical Trials Registry (ANZCTR):  
22 ACTRN12619000903189. UTN: U1111-1231-3365.

23 **Keywords:** Respiratory Tract Infections, Registries, Pediatrics, Pragmatic Clinical Trials

24 **Word count:** 2738

25

26

1  
2  
3  
4  
5  
6  
7  
8  
9  
10  
11  
12  
13  
14  
15  
16  
17  
18  
19  
20  
21  
22  
23  
24  
25  
26  
27  
28  
29  
30  
31  
32  
33  
34  
35  
36  
37  
38  
39  
40  
41  
42  
43  
44  
45  
46  
47  
48  
49  
50  
51  
52  
53  
54  
55  
56  
57  
58  
59  
60

1

For peer review only

### 1 Strengths and limitations of this study:

- 2 • This clinical registry provides a mechanism to optimise acute respiratory infection (ARI)  
3 care and a platform for future ARI intervention trials.
- 4 • Patient-reported outcomes and use of parents' hand-held devices enables a more flexible  
5 approach to registry data collection.
- 6 • Emergency department recruitment may result in the enrolment of children with more  
7 severe ARI.
- 8 • Follow-up is dependent on parental recall and timely data entry by parents.
- 9 • Current study materials may not be culturally appropriate for all patient groups (i.e.,  
10 Aboriginal and Torres Strait Islander populations, who experience an increased burden of  
11 ARI).

### 13 Introduction

14 Acute respiratory infections (ARI), inclusive of both upper and lower respiratory tract infections  
15 (URTI, LRTI), are common in children. While URTI is mostly mild and self-limiting, LRTIs  
16 including pneumonia and bronchiolitis are frequent causes of paediatric hospital admissions.  
17 Outside the neonatal period, ARI remains the leading cause of childhood mortality (1) with global  
18 data (2019) estimating that LRTI resulted in 671,927 deaths, and 59.2 million disability-adjusted  
19 life years for children under 5 years (2). In Australia, ARI-associated mortality is rare, but the  
20 morbidity and economic burden of paediatric ARI remains substantial. It is estimated that, on  
21 average, Australian children experience thirteen ARI episodes in their first two years of life (3). In  
22 Western Australia (WA), ARI is the most common reason for childhood presentation to an  
23 emergency department and hospitalisation (4), with at least one in four Aboriginal children and  
24 one in fifteen non-Aboriginal children in WA hospitalised for a chest infection before their fifth  
25 birthday (5).

26  
27 Most ARI episodes are secondary to respiratory viruses (6, 7). A recent case-control study  
28 investigating the viral and bacterial burden of pneumonia in WA children found that one or more  
29 respiratory virus was identified in 56% of cases versus 29% of controls (6). The population-

1  
2  
3 1 attributable fraction for pneumonia by Respiratory Syncytial Virus (RSV), human  
4 2 metapneumovirus (HMPV), influenza, and adenovirus was estimated to 20%, 10%, 6% and 4%  
5 3 respectively. This is compared with the most frequently detected bacterial species, *Mycoplasma*  
6 4 *pneumoniae* (attributable fraction; 7%). *Streptococcus pneumoniae*, *Haemophilus influenzae* and  
7 5 *Streptococcus pyogenes* are important bacterial causes of ARI.  
8  
9  
10  
11  
12 6

13 7 Many of the current treatment recommendations for paediatric ARI have not been tested through  
14 8 clinical trials. Antibiotics are frequently prescribed for management of childhood pneumonia and  
15 9 many other ARIs (6, 8). However, given the substantial contribution of respiratory viruses to  
16 10 paediatric ARI, antibiotics may have little or no benefit in most ARI cases. Antimicrobial  
17 11 resistance (AMR) has been identified by the World Health Organization as a serious global threat.  
18 12 Injudicious use of antibiotics for ARI care contributes to the global concern of AMR (9). Well-  
19 13 designed antimicrobial trials for ARI management, conducted in the era of conjugate  
20 14 pneumococcal and HiB vaccination are few in number (10) and supportive care trials have been  
21 15 infrequently performed (11).  
22  
23  
24  
25  
26  
27  
28  
29  
30

31 17 More than a decade ago, the Infectious Disease Society of America (IDSA) recommended robust  
32 18 time-to-event analyses in ARI trial design (12). However, despite numerous professional societies  
33 19 noting the limited trial data (10, 13), there has been slow progress towards evidence-based  
34 20 antimicrobial use in ARI management. Traditional randomised controlled trials have inherent  
35 21 design limitations, including increased expense, reduced generalisability, and delays in research  
36 22 translation. Provided the ongoing uncertainty about optimal ARI management strategies, the  
37 23 increasing threat of AMR and new therapeutic options expected; barriers to conducting clinical  
38 24 trials for ARI in paediatric populations must be overcome.  
39  
40  
41  
42  
43  
44  
45

46 26 To drive and inform evidence-based ARI care, we have established a prospective clinical registry  
47 27 recruiting children with ARI presenting for urgent care at the emergency department (ED). This  
48 28 has been developed to document risk factors, symptoms, severity and duration of illness,  
49 29 microbiology (when obtained), treatment adherence and disease outcomes and to explore factors  
50 30 associated with rapid symptom resolution. The Pragmatic Adaptive Trial for Respiratory Infection  
51 31 in Children (PATRIC) Clinical Registry serves as a research platform, generating critical baseline  
52  
53  
54  
55  
56  
57  
58  
59  
60

1 data for future clinical trials in ARI, focusing on time-to-event endpoints. Commencing in a single  
2 centre, the registry has been designed to expand into a multicentre registry and adaptive clinical  
3 trial platform.  
4

### 5 **Primary objective**

6 The PATRIC Clinical Registry aims to: (i) accurately and efficiently characterise demographic,  
7 clinical, treatment, and outcome data from eligible participants in order to optimise the care of  
8 children with ARI and, (ii) provide the underlying preliminary evidence and platform for a  
9 pragmatic adaptive clinical trial on childhood ARI, a critical step towards evidence-based ARI  
10 care.  
11

### 12 **Secondary objectives**

13 Secondary objectives are to: (i) demonstrate the willingness of parents and/or guardians (hereafter  
14 referred to as parents) to enrol their children in an electronic prospective ARI registry; (ii) estimate  
15 the distribution of treatment response under alternative management options within different ARI  
16 patient subgroups; (iii) optimise parent-reported outcomes and refine patient-reported outcome  
17 measures for ARI treatment and (iv) provide surveillance data to characterise seasonal trends in  
18 ARI and real-time data for ARI epidemics as they arise.  
19

### 20 **Methods and analysis**

#### 21 **Study design**

22 The PATRIC Clinical Registry is an observational, prospective cohort of children who present to  
23 an emergency department with an ARI. Information including demographic, symptoms,  
24 vaccination history, medical history, treatment, and follow-up responses are collected.  
25  
26  
27

1  
2  
3 1 The PATRIC Clinical Registry provides the foundation for the PATRIC platform, collecting  
4 2 baseline data to inform the design of and providing tools and mechanism to recruit to ARI  
5 3 intervention trials nested within the platform. While this manuscript describes the methodology  
6 4 for the PATRIC Clinical Registry, each individual trial to be conducted within the PATRIC  
7 5 platform will have an independent protocol, with unique objectives and outcomes. Each PATRIC  
8 6 trial will also have individual ethics and regulatory approvals as required. It is proposed that trials  
9 7 may involve antimicrobial, immunomodulatory, and supportive care interventions.  
10  
11  
12  
13  
14  
15  
16  
17

### 18 9 **Patient and community involvement**

10 The objectives of the PATRIC Clinical Registry have been discussed with, and supported by, the  
11 *Wesfarmers Centre of Vaccines and Infectious Diseases (WCVID) Consumer Reference Group* to  
12 ensure the study objectives and procedures are relevant and acceptable for the ARI patient  
13 community. An information video, participant information sheet, e-consent forms, e-survey, and  
14 supportive information sheets were co-designed with input from consumers and tested for usability  
15 and acceptance with a pilot group of parents of young children (14). Intervention in the future  
16 PATRIC trials will also be guided by discussions and the priorities of the WCVID consumer  
17 reference group as well as other consumer groups.  
18

### 19 **Study setting**

20 Participants are enrolled from children presenting with physician-diagnosed ARI to the emergency  
21 department. At time of writing, recruitment is underway at Perth Children's Hospital (PCH),  
22 Western Australia (WA). The PCH is the only tertiary paediatric hospital for the state of WA  
23 (population: 2.6 million (15)). It is intended that the PATRIC Clinical Registry will be  
24 implemented across multiple sites in Australia, initially focusing on paediatric emergency  
25 departments. Recruitment started in February 2020 and is ongoing. The PATRIC Clinical Registry  
26 is designed to prospectively collect data on eligible participants.  
27

### 28 **Eligibility criteria, sample size and recruitment procedures**

## 1 ***Inclusion Criteria***

2 Children and adolescents who meet the following criteria are eligible for registry enrolment:

- 3 (i) aged  $\geq 1$  months and  $<18$  years AND
- 4 (ii) symptoms and signs of ARI: a documented fever  $\geq 37.5^{\circ}\text{C}$  or history of fever in the past  
5 96 hours AND cough, and/or shortness of breath and/or influenza-like symptoms such  
6 as sore throat or fatigue AND
- 7 (iii) total duration of symptoms  $<21$  days at time of enrolment.

## 9 ***Exclusion criteria***

10 A potentially eligible child who meets any of the following criteria will be excluded from  
11 participation:

- 12 (i) children  $< 1$  months old or 18 years and older OR
- 13 (ii) previous participation in PATRIC within the last 3 months OR
- 14 (iii) parents whose English is insufficient to understand study materials, OR
- 15 (iv) parents do not complete the baseline survey, OR
- 16 (v) parents not willing or able to provide consent.

## 18 ***Patient recruitment and consent***

19 The registry does not have a fixed sample size. ED research nurses will identify and approach  
20 parents whose children meet the eligibility criteria. Parents are then presented a departmental  
21 electronic tablet to view the 3min participant information video, information form and electronic  
22 consent form. They are also able to access these materials on their own hand-held device using a  
23 QR code. Upon completion of the electronic consent, a copy of the participant information sheet,  
24 and signed electronic consent is sent to the parents' email address. As shown in Figure 1, The Day  
25 0 baseline survey is then sent immediately to the parent/carers mobile phone following completion  
26 of the e-consent form. The Research Electronic Data Capture application (REDCap; Vanderbilt  
27 University, Nashville, TN, US), application is used for e-consent, follow-up surveys, and the case  
28 report form.



1  
2  
3 1  
4  
5**2 Data collection procedures****3 Day 0 survey**

4 Parent-reported surveys sent on day 0 collect information on demographics, relevant comorbidities  
5 (e.g., immunodeficiency, chronic heart, and lung disease), history of any previous hospitalisation  
6 with acute respiratory infections, household structure (number of children and adults), attendance  
7 at out-of-home care/education (playgroup/mothers' group, day-care, kindergarten, preschool or  
8 school), symptoms and behaviours observed in the preceding 24 hours (using the Canadian Acute  
9 Respiratory Illness and Flu Scale, CARIFS (16)), additional symptoms to better capture lower  
10 respiratory involvement (wheezing and difficulty breathing), and antibiotics or antivirals received  
11 prior to the ED visit.

12

**13 Case Report Form (CRF), immunisation data, and biological samples**

14 In additional to parent-completed Day 0 baseline survey, information on a patient electronic CRF  
15 is entered by a research nurse, and includes information on demographics (age, sex, postcode, and  
16 ethnicity), presentation and ED management (health assessments, support required, investigations  
17 required and results, discharge diagnosis, and medications provided). Immunisations registered  
18 with the Australian Immunisation Registry are collected independently and linked to the  
19 participant using 3 identifiers (name, DOB, Medicare number). The e-consent form also provides  
20 the option to consent to the salvage of biological specimens collected during routine care for the  
21 ARI episode.

22

**23 Follow-up**

24 Patient-reported outcome and patient-reported outcome measures are recommended as a way of  
25 capturing the true impact of disease on children and families over time. Parents receive weekly  
26 follow-up surveys every 7 days from day 7 until symptom recovery, or day 28 (whichever occurs  
27 earlier), sent to parents' smart phones via automated messaging. The 7-day follow-up was chosen  
28 in an attempt to maximise retention, minimise loss to follow up and ensure the generalisability of  
29 results. Parents are also asked to report on the presence and severity of several respiratory,

30

31

32

33

34

35

1 behavioural, and activity-based outcomes (using CARIFS) and additional symptoms (wheezing  
2 and difficulty breathing) to capture lower respiratory involvement.

3  
4 Additional outcomes, developed in collaboration with consumers, are also requested at each time  
5 point. These include parents answering “yes” or “no” to the question: “Is your child still sick?”. In  
6 addition, two summary questions are asked: a) “Has your child returned to playgroup/mothers'  
7 group, day-care, kindergarten, preschool or school in last 7 days?”, if yes, “when”); and b) “Is your  
8 child as active as usual today?”, if yes, “When did your child return to their usual level of activity?”  
9 These questions are used to determine time dependent outcomes (see secondary outcomes). Parents  
10 are also asked if their child has received additional medical care or prescription medication.

11  
12 If the parent completing a follow-up survey on Day 7, 14, 21 or 28 reports that their child is “still  
13 sick”, they will be provided with the option to access a link to downloadable supportive  
14 information sheet “*Respiratory Tract Infection – General Home Care Advice*”. This resource has  
15 been developed in consultation with clinicians and parent groups. The instructions are written at  
16 a level of readability appropriate for the general population with accompanying pictograms.  
17 Emphasis has also been placed on making the information accessible for all parents including those  
18 with low health literacy. The information sheet outlines how to provide supportive care for a child  
19 with an ARI, provides links to further resources as well as contact phone numbers for further health  
20 advice.

## 21 22 **Outcome measures**

### 23 ***Primary Outcome***

24 The primary endpoint for the registry will be the return to pre-morbid health state, as assessed by  
25 parents, by day 7. This will be determined by the parental survey response on day 7.

### 26 27 ***Secondary Outcomes***

1  
2  
3 1 The secondary endpoints for the registry are: (i) time to full recovery of ARI symptoms (in days,  
4 (ii) time to return to normal childhood activities (in days; defined as: sufficient improvement to  
5 return to day-care; school; playgroups or other social outings), (iii) proportion of children who  
6 have returned to their pre-morbid health state by day 7, 14, 21 and 28, (iv) proportion of children  
7 who are free from cough by day 7, 14, 21 and 28, (v) proportion of children who are free from  
8 fever by day 7, 14, 21 and 28, (vi) proportion of children with clinical failure (defined as: repeat  
9 emergency presentation or hospitalisation; general practice re-presentation; modification or  
10 unplanned prolongation of antibiotic therapy) by day 7, 14, 21, 28, (vii) proportion of children  
11 intolerant to therapy. These endpoints will be assessed using data from the parental surveys and/or  
12 any post enrolment return presentation to the ED.  
13  
14  
15  
16  
17  
18  
19  
20  
21  
22

## 23 **Data management**

24  
25  
26 13 Registry data derived from parental surveys (provided at enrolment and at regular intervals  
27 thereafter) and case report forms (collected by a research nursing and capturing discharge  
28 diagnosis, laboratory, radiology, and pharmacy data). All data are directly entered into a web-  
29 based database (REDCap). To ensure all data is stored safely in confidential conditions, each  
30 participant record will be referred to by a unique study-specific identifier and accessible only by  
31 study personnel. Paper materials linking the participant to medical data or any other database  
32 material will be maintained on site in a secure location.  
33  
34  
35  
36  
37  
38  
39  
40

## 41 **Data analysis plan**

42  
43 22 Proportion reaching the primary outcome and the median time to reach secondary outcomes, as  
44 determined by parental surveys, will be assessed in the PATRIC Clinical Registry. Subgroup  
45 analysis, by age group, risk factors and treatments prescribed will be performed and compared.  
46  
47 24 Severe outcomes, including hospital representation, will be cross-checked against the medical  
48 record. The proportion lost to follow up prior to return to their premorbid state will also be  
49 reported.  
50  
51  
52  
53  
54  
55  
56  
57  
58  
59  
60

1  
2  
3 1 Summarised descriptive statistics for individual demographics, risk factors, concurrent  
4 2 medications, allergies, immunisation status, ARI diagnosis and clinical markers of severity  
5 3 (temperature, respiratory rate, oxygen saturations on air) will be reported for all enrolled  
6 4 participants. Subgroup analysis will be stratified by age groups (infants: <12 months; young  
7 5 children: 13-59 months; older children:  $\geq 60$  months), antibiotic exposure (before presentation to  
8 6 hospital, prescribed during their hospital stay or by other healthcare provider during follow-up  
9 7 period), laboratory-confirmed viral and bacterial ARI and risk factors (e.g., immunocompromising  
10 8 conditions).

11 9 Proportions for categorical variables will be summarised as frequency and percent proportion, with  
12 10 95% confidence intervals. Frequencies below five will be reported as “<5” to ensure  
13 11 confidentiality. Summaries of continuous variables will be reported as mean and standard  
14 12 deviation for symmetric distributions and median and interquartile range for asymmetric  
15 13 distributions.

16 14 Associations between specific covariates of interest and the primary or secondary outcomes will  
17 15 be explored using prediction models. Logistic and cox proportional hazards regression models will  
18 16 be primarily used with random effects models considered if clustering by site is observed post  
19 17 multisite expansion. The adjusted odds of returning to a pre-morbid health state 7 days after  
20 18 presentation (or hazards if time-dependent secondary outcomes are assessed) can be determined  
21 19 by demographics and risk factors (such as age, ethnicity, and previous infection), clinical  
22 20 presentation (such as symptoms, oxygen saturation, and respiratory rate), investigations ordered  
23 21 (such as chest x-ray, and nasopharyngeal swabs), and discharge diagnosis.

24  
25  
26  
27  
28  
29  
30  
31  
32  
33  
34  
35  
36  
37  
38  
39  
40  
41  
42  
43

### 24 **Use of the platform for nested clinical trials**

44 24 The PATRIC Clinical Registry provides a framework for intervention studies, randomising  
45 25 participants to specific diagnostic approaches and treatments. PATRIC trials share similar data and  
46 26 use the same clinical outcomes. Data from the registry will continue to inform trial simulations  
47 27 and provided baselines for standard of care.

48 28 A pilot clinical trial, assessing the optimal duration of amoxicillin duration in physician-diagnosed  
49 29 community-acquired pneumonia is underway (ACTRN12621000967886). This open label trial

1 aims to identify a minimum non-inferior dose of antibiotics to the current standard of care, where  
2 the interventions include various lengths of amoxicillin therapy and the primary outcome is the  
3 proportion returning to a pre-morbid health state 7 days after presentation. In addition to existing  
4 registry surveys, families will receive additional monitoring surveys on days 2, 4, and 10 after  
5 presentation to ensure sufficient resolution to compare different durations of therapy. Analysis will  
6 be undertaken on an intention to treat basis primarily involving estimating dose response.  
7 Statistical inference will be computed under a Bayesian framework using Markov chain Monte  
8 Carlo methods. Prior distributions for the trial framework will be learned from accumulated  
9 evidence in the registry.

## 11 **Ethics and dissemination**

12 The PATRIC platform and embedded registry is conducted in accordance with the principles of  
13 the Declaration of Helsinki, the International Council for Harmonisation (ICH) Guidelines for  
14 Good Clinical Practice (CPMP/ICH/13595). Platform materials, including protocols and  
15 amendments are submitted to an appropriate human research ethics committee (HREC), and host  
16 institution for written approval as required. Written consent is obtained from parents during  
17 recruitment. PATRIC staff ensure the participants' anonymity is maintained through de-  
18 identifying data and using a participant identifier for analysis. All data is collected, stored, and  
19 removed in compliance with data protection laws. Study results will be communicated by  
20 presentation and journal publication.

## 22 **Acknowledgements**

23 Authors wish to thank consumers Catherine Hughes and Alanna Garner Bell who provided  
24 feedback on the protocol and study materials, and ED research nursing staff (Annika  
25 Featherstone, Catherine Power, Dana Aindow, Dayna Luscombe, Katy Whitten, Lisa Properjohn,  
26 Melanie Dowd, Melissa O'Brien Smith, and Patricia Clifford) who have assisted with  
27 recruitment. The authors wish to thank all families who have participated to date.

## 29 **Authors contributions**

1 RP, MUB, MLB, SO, TLS and CCB designed the registry and trial platform. Expert advice was  
2 provided by AM and PCR. RP and CCB wrote the protocol, sought ethics approval and funding.  
3 MUB developed the database and MAJ assisted with statistical advice and simulations for nested  
4 clinical trials. RP, SD, MLB and CCB designed electronic consent and registry materials. RP and  
5 DO led the writing of this manuscript. All authors have read and approved the final version of  
6 this manuscript.

### 7 8 **Funding statement**

9 At initiation, the trial had funding from Telethon Kids Institute, The Ramaciotti Foundation  
10 (2018HIG00032) and University of Western Australia. Further grant applications have been  
11 submitted. TLS is supported by a MRFF Investigator Award (MRF1195153). CCB is supported  
12 by a NHMRC Investigator Award (GNT1173163).

### 13 14 **Competing interest's statement**

15 The authors have no competing interests to disclose.

16 *Figure 1: Flowchart of PATRIC registry design surveys, and the case report form*

### 17 18 **References:**

- 19 1. GBD 2019 Diseases and Injuries Collaborators. Global burden of 369 diseases and injuries  
20 in 204 countries and territories, 1990-2019: a systematic analysis for the Global Burden of Disease  
21 Study 2019. *Lancet*. 2020;396(10258):1204-22.
- 22 2. Paulson KR, Kamath AM, Alam T, Bienhoff K, Abady GG, Abbas J, et al. Global,  
23 regional, and national progress towards Sustainable Development Goal 3.2 for neonatal and child  
24 health: all-cause and cause-specific mortality findings from the Global Burden of Disease Study  
25 2019. *The Lancet*. 2021;398(10303):870-905.
- 26 3. Sarna M, Ware RS, Sloots TP, Nissen MD, Grimwood K, Lambert SB. The burden of  
27 community-managed acute respiratory infections in the first 2-years of life. *Pediatr Pulmonol*.  
28 2016;51(12):1336-46.
- 29 4. Barnes R, Blyth CC, de Klerk N, Lee WH, Borland ML, Richmond P, et al. Geographical  
30 disparities in emergency department presentations for acute respiratory infections and risk factors  
31 for presenting: a population-based cohort study of Western Australian children. *BMJ Open*.  
32 2019;9(2):e025360.

- 1 5. Moore HC, de Klerk N, Richmond P, Lehmann D. A retrospective population-based cohort  
2 study identifying target areas for prevention of acute lower respiratory infections in children. *BMC*  
3 *Public Health*. 2010;10:757.
- 4 6. Bhuiyan MU, Snelling TL, West R, Lang J, Rahman T, Granl, et al. The contribution of  
5 viruses and bacteria to community-acquired pneumonia in vaccinated children: A case-control  
6 study. *Thorax*. 2019;74(3):261-9.
- 7 7. Jain S, Williams DJ, Arnold SR, Ampofo K, Bramley AM, Reed C, et al. Community-  
8 Acquired Pneumonia Requiring Hospitalization among U.S. Children. *New England Journal of*  
9 *Medicine*. 2015;372(9):835-45.
- 10 8. Biezen R, Pollack AJ, Harrison C, Brijnath B, Grando D, Britt HC, et al. Respiratory tract  
11 infections among children younger than 5 years: current management in Australian general  
12 practice. *Med J Aust*. 2015;202(5):262-6.
- 13 9. World Health Organization (WHO). The evolving threat of antimicrobial resistance :  
14 options for action. Geneva: World Health Organization; 2012.
- 15 10. Bradley JS, Byington CL, Shah SS, Alverson B, Carter ER, Harrison C, et al. Executive  
16 summary: the management of community-acquired pneumonia in infants and children older than  
17 3 months of age: clinical practice guidelines by the Pediatric Infectious Diseases Society and the  
18 Infectious Diseases Society of America. *Clinical infectious diseases : an official publication of the*  
19 *Infectious Diseases Society of America*. 2011;53(7):617-30.
- 20 11. Oakley E, Babl FE, Acworth J, Borland M, Kreiser D, Neutze J, et al. A prospective  
21 randomised trial comparing nasogastric with intravenous hydration in children with bronchiolitis  
22 (protocol): the comparative rehydration in bronchiolitis study (CRIB). *BMC Pediatr*. 2010;10:37.
- 23 12. Spellberg B, Talbot GH, Brass EP, Bradley JS, Boucher HW, Gilbert DN, et al. Position  
24 paper: recommended design features of future clinical trials of antibacterial agents for community-  
25 acquired pneumonia. *Clinical infectious diseases : an official publication of the Infectious Diseases*  
26 *Society of America*. 2008;47 Suppl 3:S249-65.
- 27 13. Harris M, Clark J, Coote N, Fletcher P, Harnden A, McKean M, et al. British Thoracic  
28 Society guidelines for the management of community acquired pneumonia in children: update  
29 2011. *Thorax*. 2011;66 Suppl 2:ii1-23.
- 30 14. Doyle S, Pavlos R, Carlson SJ, Barton K, Bhuiyan M, Boeing B, et al. Efficacy of Digital  
31 Health Tools for a Pediatric Patient Registry: Semistructured Interviews and Interface Usability  
32 Testing With Parents and Clinicians. *JMIR Form Res*. 2022;6(1):e29889.
- 33 15. Australian Bureau of Statistics (ABS). Snapshot of Australia [Internet]. [cited 2022  
34 November 23] ed2021.
- 35 16. Jacobs B, Young NL, Dick PT, Ipp MM, Dutkowski R, Davies HD, et al. Canadian Acute  
36 Respiratory Illness and Flu Scale (CARIFS): Development of a valid measure for childhood  
37 respiratory infections. *Journal of clinical epidemiology*. 2000;53(8):793-9.

38



Figure 1: Flowchart of PATRIC registry design surveys, and the case report form

195x245mm (72 x 72 DPI)





STANDARD PROTOCOL ITEMS: RECOMMENDATIONS FOR INTERVENTIONAL TRIALS

SPIRIT 2013 Checklist: Recommended items to address in a clinical trial protocol and related documents\*

| Section/item                      | Item No | Description                                                                                                                                                                                                                                                                              | Page number addressing item |
|-----------------------------------|---------|------------------------------------------------------------------------------------------------------------------------------------------------------------------------------------------------------------------------------------------------------------------------------------------|-----------------------------|
| <b>Administrative information</b> |         |                                                                                                                                                                                                                                                                                          |                             |
| Title                             | 1       | Descriptive title identifying the study design, population, interventions, and, if applicable, trial acronym                                                                                                                                                                             | Page 1                      |
| Trial registration                | 2a      | Trial identifier and registry name. If not yet registered, name of intended registry                                                                                                                                                                                                     | Page 1                      |
|                                   | 2b      | All items from the World Health Organization Trial Registration Data Set                                                                                                                                                                                                                 | Page 1                      |
| Protocol version                  | 3       | Date and version identifier                                                                                                                                                                                                                                                              | N/A                         |
| Funding                           | 4       | Sources and types of financial, material, and other support                                                                                                                                                                                                                              | Page 12                     |
| Roles and responsibilities        | 5a      | Names, affiliations, and roles of protocol contributors                                                                                                                                                                                                                                  | Page 1, 11                  |
|                                   | 5b      | Name and contact information for the trial sponsor                                                                                                                                                                                                                                       | Page 12                     |
|                                   | 5c      | Role of study sponsor and funders, if any, in study design; collection, management, analysis, and interpretation of data; writing of the report; and the decision to submit the report for publication, including whether they will have ultimate authority over any of these activities | Investigator led, Page 12.  |
|                                   | 5d      | Composition, roles, and responsibilities of the coordinating centre, steering committee, endpoint adjudication committee, data management team, and other individuals or groups overseeing the trial, if applicable (see Item 21a for data monitoring committee)                         | N/A                         |
| <b>Introductio</b>                |         |                                                                                                                                                                                                                                                                                          |                             |

|                                                           |     |                                                                                                                                                                                                           |          |
|-----------------------------------------------------------|-----|-----------------------------------------------------------------------------------------------------------------------------------------------------------------------------------------------------------|----------|
| <b>n</b>                                                  |     |                                                                                                                                                                                                           |          |
| Background and rationale                                  | 6a  | Description of research question and justification for undertaking the trial, including summary of relevant studies (published and unpublished) examining benefits and harms for each intervention        | Page 3-4 |
|                                                           | 6b  | Explanation for choice of comparators                                                                                                                                                                     | N/A      |
| Objectives                                                | 7   | Specific objectives or hypotheses                                                                                                                                                                         | Page 4-5 |
| Trial design                                              | 8   | Description of trial design including type of trial (eg, parallel group, crossover, factorial, single group), allocation ratio, and framework (eg, superiority, equivalence, noninferiority, exploratory) | Page 5   |
| <b>Methods: Participants, interventions, and outcomes</b> |     |                                                                                                                                                                                                           |          |
| Study setting                                             | 9   | Description of study settings (eg, community clinic, academic hospital) and list of countries where data will be collected. Reference to where list of study sites can be obtained                        | Page 6   |
| Eligibility criteria                                      | 10  | Inclusion and exclusion criteria for participants. If applicable, eligibility criteria for study centres and individuals who will perform the interventions (eg, surgeons, psychotherapists)              | Page 6-7 |
| Interventions                                             | 11a | Interventions for each group with sufficient detail to allow replication, including how and when they will be administered                                                                                | N/A      |
|                                                           | 11b | Criteria for discontinuing or modifying allocated interventions for a given trial participant (eg, drug dose change in response to harms, participant request, or improving/worsening disease)            | N/A      |
|                                                           | 11c | Strategies to improve adherence to intervention protocols, and any procedures for monitoring adherence (eg, drug tablet return, laboratory tests)                                                         | N/A      |

|                                                                     |     |                                                                                                                                                                                                                                                                                                                                                                                |           |
|---------------------------------------------------------------------|-----|--------------------------------------------------------------------------------------------------------------------------------------------------------------------------------------------------------------------------------------------------------------------------------------------------------------------------------------------------------------------------------|-----------|
|                                                                     | 11d | Relevant concomitant care and interventions that are permitted or prohibited during the trial                                                                                                                                                                                                                                                                                  | N/A       |
| Outcomes                                                            | 12  | Primary, secondary, and other outcomes, including the specific measurement variable (eg, systolic blood pressure), analysis metric (eg, change from baseline, final value, time to event), method of aggregation (eg, median, proportion), and time point for each outcome. Explanation of the clinical relevance of chosen efficacy and harm outcomes is strongly recommended | Page 9-10 |
| Participant timeline                                                | 13  | Time schedule of enrolment, interventions (including any run-ins and washouts), assessments, and visits for participants. A schematic diagram is highly recommended (see Figure)                                                                                                                                                                                               | Page 7-9  |
| Sample size                                                         | 14  | Estimated number of participants needed to achieve study objectives and how it was determined, including clinical and statistical assumptions supporting any sample size calculations                                                                                                                                                                                          | N/A       |
| Recruitment                                                         | 15  | Strategies for achieving adequate participant enrolment to reach target sample size                                                                                                                                                                                                                                                                                            | Page 7    |
| <b>Methods: Assignment of interventions (for controlled trials)</b> |     |                                                                                                                                                                                                                                                                                                                                                                                |           |
| Allocation:                                                         |     |                                                                                                                                                                                                                                                                                                                                                                                |           |
| Sequence generation                                                 | 16a | Method of generating the allocation sequence (eg, computer-generated random numbers), and list of any factors for stratification. To reduce predictability of a random sequence, details of any planned restriction (eg, blocking) should be provided in a separate document that is unavailable to those who enrol participants or assign interventions                       | N/A       |

|                                                           |     |                                                                                                                                                                                                                                                                                                                                                                                                              |           |
|-----------------------------------------------------------|-----|--------------------------------------------------------------------------------------------------------------------------------------------------------------------------------------------------------------------------------------------------------------------------------------------------------------------------------------------------------------------------------------------------------------|-----------|
| Allocation concealment mechanism                          | 16b | Mechanism of implementing the allocation sequence (eg, central telephone; sequentially numbered, opaque, sealed envelopes), describing any steps to conceal the sequence until interventions are assigned                                                                                                                                                                                                    | N/A       |
| Implementation                                            | 16c | Who will generate the allocation sequence, who will enrol participants, and who will assign participants to interventions                                                                                                                                                                                                                                                                                    | N/A       |
| Blinding (masking)                                        | 17a | Who will be blinded after assignment to interventions (eg, trial participants, care providers, outcome assessors, data analysts), and how                                                                                                                                                                                                                                                                    | N/A       |
|                                                           | 17b | If blinded, circumstances under which unblinding is permissible, and procedure for revealing a participant's allocated intervention during the trial                                                                                                                                                                                                                                                         | N/A       |
| <b>Methods: Data collection, management, and analysis</b> |     |                                                                                                                                                                                                                                                                                                                                                                                                              |           |
| Data collection methods                                   | 18a | Plans for assessment and collection of outcome, baseline, and other trial data, including any related processes to promote data quality (eg, duplicate measurements, training of assessors) and a description of study instruments (eg, questionnaires, laboratory tests) along with their reliability and validity, if known. Reference to where data collection forms can be found, if not in the protocol | Page 7-9  |
|                                                           | 18b | Plans to promote participant retention and complete follow-up, including list of any outcome data to be collected for participants who discontinue or deviate from intervention protocols                                                                                                                                                                                                                    | Page 7-10 |
| Data management                                           | 19  | Plans for data entry, coding, security, and storage, including any related processes to promote data quality (eg, double                                                                                                                                                                                                                                                                                     | Page 9-10 |

|                            |     |                                                                                                                                                                                                                                                                                                                                       |         |
|----------------------------|-----|---------------------------------------------------------------------------------------------------------------------------------------------------------------------------------------------------------------------------------------------------------------------------------------------------------------------------------------|---------|
|                            |     | data entry; range checks for data values). Reference to where details of data management procedures can be found, if not in the protocol                                                                                                                                                                                              |         |
| Statistical methods        | 20a | Statistical methods for analysing primary and secondary outcomes. Reference to where other details of the statistical analysis plan can be found, if not in the protocol                                                                                                                                                              | Page 10 |
|                            | 20b | Methods for any additional analyses (eg, subgroup and adjusted analyses)                                                                                                                                                                                                                                                              | Page 10 |
|                            | 20c | Definition of analysis population relating to protocol non-adherence (eg, as randomised analysis), and any statistical methods to handle missing data (eg, multiple imputation)                                                                                                                                                       | Page 10 |
| <b>Methods: Monitoring</b> |     |                                                                                                                                                                                                                                                                                                                                       |         |
| Data monitoring            | 21a | Composition of data monitoring committee (DMC); summary of its role and reporting structure; statement of whether it is independent from the sponsor and competing interests; and reference to where further details about its charter can be found, if not in the protocol. Alternatively, an explanation of why a DMC is not needed | N/A     |
|                            | 21b | Description of any interim analyses and stopping guidelines, including who will have access to these interim results and make the final decision to terminate the trial                                                                                                                                                               | Page 10 |
| Harms                      | 22  | Plans for collecting, assessing, reporting, and managing solicited and spontaneously reported adverse events and other unintended effects of trial interventions or trial conduct                                                                                                                                                     | N/A     |
| Auditing                   | 23  | Frequency and procedures for auditing trial conduct, if any, and whether the process will be                                                                                                                                                                                                                                          | N/A     |

|                                 |     |                                                                                                                                                                                                                                  |         |
|---------------------------------|-----|----------------------------------------------------------------------------------------------------------------------------------------------------------------------------------------------------------------------------------|---------|
|                                 |     | independent from investigators and the sponsor                                                                                                                                                                                   |         |
| <b>Ethics and dissemination</b> |     |                                                                                                                                                                                                                                  |         |
| Research ethics approval        | 24  | Plans for seeking research ethics committee/institutional review board (REC/IRB) approval                                                                                                                                        | Page 11 |
| Protocol amendments             | 25  | Plans for communicating important protocol modifications (eg, changes to eligibility criteria, outcomes, analyses) to relevant parties (eg, investigators, REC/IRBs, trial participants, trial registries, journals, regulators) | Page 5  |
| Consent or assent               | 26a | Who will obtain informed consent or assent from potential trial participants or authorised surrogates, and how (see Item 32)                                                                                                     | Page 7  |
|                                 | 26b | Additional consent provisions for collection and use of participant data and biological specimens in ancillary studies, if applicable                                                                                            | Page 7  |
| Confidentiality                 | 27  | How personal information about potential and enrolled participants will be collected, shared, and maintained in order to protect confidentiality before, during, and after the trial                                             | Page 10 |
| Declaration of interests        | 28  | Financial and other competing interests for principal investigators for the overall trial and each study site                                                                                                                    | Page 12 |
| Access to data                  | 29  | Statement of who will have access to the final trial dataset, and disclosure of contractual agreements that limit such access for investigators                                                                                  | Page 10 |
| Ancillary and post-trial care   | 30  | Provisions, if any, for ancillary and post-trial care, and for compensation to those who suffer harm from trial participation                                                                                                    | N/A     |
| Dissemination policy            | 31a | Plans for investigators and sponsor to communicate trial results to participants, healthcare professionals, the public, and other relevant groups (eg, via                                                                       | Page 11 |

|                            |     |                                                                                                                                                                                                |     |
|----------------------------|-----|------------------------------------------------------------------------------------------------------------------------------------------------------------------------------------------------|-----|
|                            |     | publication, reporting in results databases, or other data sharing arrangements), including any publication restrictions                                                                       |     |
|                            | 31b | Authorship eligibility guidelines and any intended use of professional writers                                                                                                                 | N/A |
|                            | 31c | Plans, if any, for granting public access to the full protocol, participant-level dataset, and statistical code                                                                                | N/A |
| <b>Appendices</b>          |     |                                                                                                                                                                                                |     |
| Informed consent materials | 32  | Model consent form and other related documentation given to participants and authorised surrogates                                                                                             | N/A |
| Biological specimens       | 33  | Plans for collection, laboratory evaluation, and storage of biological specimens for genetic or molecular analysis in the current trial and for future use in ancillary studies, if applicable | N/A |

\*It is strongly recommended that this checklist be read in conjunction with the SPIRIT 2013 Explanation & Elaboration for important clarification on the items. Amendments to the protocol should be tracked and dated. The SPIRIT checklist is copyrighted by the SPIRIT Group under the Creative Commons "[Attribution-NonCommercial-NoDerivs 3.0 Unported](https://creativecommons.org/licenses/by-nc-nd/3.0/)" license.
